# Supplementary material for: Biosynthesis of the sactipeptide Ruminococcin C by the human microbiome: Mechanistic insights into thioether bond formation by radical SAM enzymes
Source: PubMed Central journal article supplement (PMC8188230; doi:10.1074/jbc.ra120.015371), 2021-01-13
Supplement: mmc1.pdf [file mmc1.pdf]

*Supporting Information for:*

**Biosynthesis of the sactipeptide Ruminococcin C by the human microbiome: Mechanistic insights into thioether bond formation by radical SAM enzymes**

**Clémence Balty<sup>1</sup>, Alain Guillot<sup>1</sup>, Laura Fradale<sup>1</sup>, Clémence Brewée<sup>1</sup>, Benjamin Lefranc<sup>2</sup>, Christian Herrero<sup>3</sup>, Corine Sandström<sup>4</sup>, Jérôme Leprince<sup>2</sup>, Olivier Berteau<sup>1\*</sup> & Alhosna Benjdia<sup>1\*</sup>**

<sup>1</sup> Université Paris-Saclay, INRAE, AgroParisTech, Micalis Institute, ChemSyBio, 78350 Jouy-en-Josas, France

<sup>2</sup> Université de Normandie-Rouen, INSERM U1239, PRIMACEN, 76000 Rouen, France

<sup>3</sup> Université Paris-Saclay, CNRS, ICMMO, 91405, Orsay, France

<sup>4</sup> Department of Molecular Sciences, Uppsala BioCenter, Swedish University of Agricultural Sciences, P.O. Box 7015, SE-750 07 Uppsala, Sweden

\* : Corresponding authors

|                                                                                                                                                          |    |
|----------------------------------------------------------------------------------------------------------------------------------------------------------|----|
| <b>Figure S1</b> - Sequence alignment of RumMC1 & RumMC2 with other SPASM-domain radical SAM enzymes.....                                                | 2  |
| <b>Figure S2</b> – SDS-PAGE analysis and UV-visible spectrum of RumMC1 before (pink trace) and after (red trace) iron-sulfur cluster reconstitution..... | 3  |
| <b>Figure S3</b> – LC-MS analysis of the reaction performed with the C <sub>28-63</sub> peptide.....                                                     | 4  |
| <b>Figure S4</b> - Sequence of the C1 to C5 peptides encoded by the RumC operon .....                                                                    | 5  |
| <b>Figure S5</b> - MS/MS spectrum of the P2d peptide obtained after incubation with RumMC2.....                                                          | 6  |
| <b>Figure S6</b> - MS/MS spectrum of the P3d peptide obtained after incubation with RumMC2.....                                                          | 7  |
| <b>Figure S7</b> – MS/MS spectrum of the P4d peptide obtained after incubation with RumMC2 .....                                                         | 7  |
| <b>Figure S8</b> – MS/MS spectrum of the P6s peptide .....                                                                                               | 8  |
| <b>Figure S9</b> – MS/MS spectrum of the P6d peptide.....                                                                                                | 8  |
| <b>Figure S10</b> – MS/MS analysis of the C2 peptide after incubation in the presence of RumMC2ΔRRE and RRE-MC2.....                                     | 9  |
| <b>Table S1</b> – Peptides used in this study and their theoretical and observed (obs) masses .....                                                      | 10 |
| <b>Table S2</b> - Theoretical mass fragments of peptide C <sub>28-63</sub> [M+H] <sup>+</sup> .....                                                      | 11 |
| <b>Table S3</b> - Theoretical mass fragments of peptide C <sub>28-63</sub> K <sup>53</sup> K <sup>61</sup> [M+H] <sup>+</sup> .....                      | 12 |
| <b>Table S4</b> - Theoretical mass fragments of peptide C <sub>28-63</sub> A <sup>61</sup> [M+H] <sup>+</sup> .....                                      | 13 |
| <b>Table S5</b> - Theoretical mass fragments of peptide C <sub>28-63</sub> T <sup>61</sup> [M+H] <sup>+</sup> .....                                      | 14 |
| <b>Table S6</b> - Theoretical mass fragments of peptide C <sub>28-63</sub> G <sup>61</sup> [M+H] <sup>+</sup> .....                                      | 15 |
| <b>Table S7</b> - Theoretical mass fragments of peptide C <sub>28-63</sub> A <sup>61</sup> d <sub>4</sub> .....                                          | 16 |
| <b>Table S8</b> - Theoretical Mass fragments of peptide C <sub>28-63</sub> A <sup>61</sup> d <sub>3</sub> .....                                          | 17 |

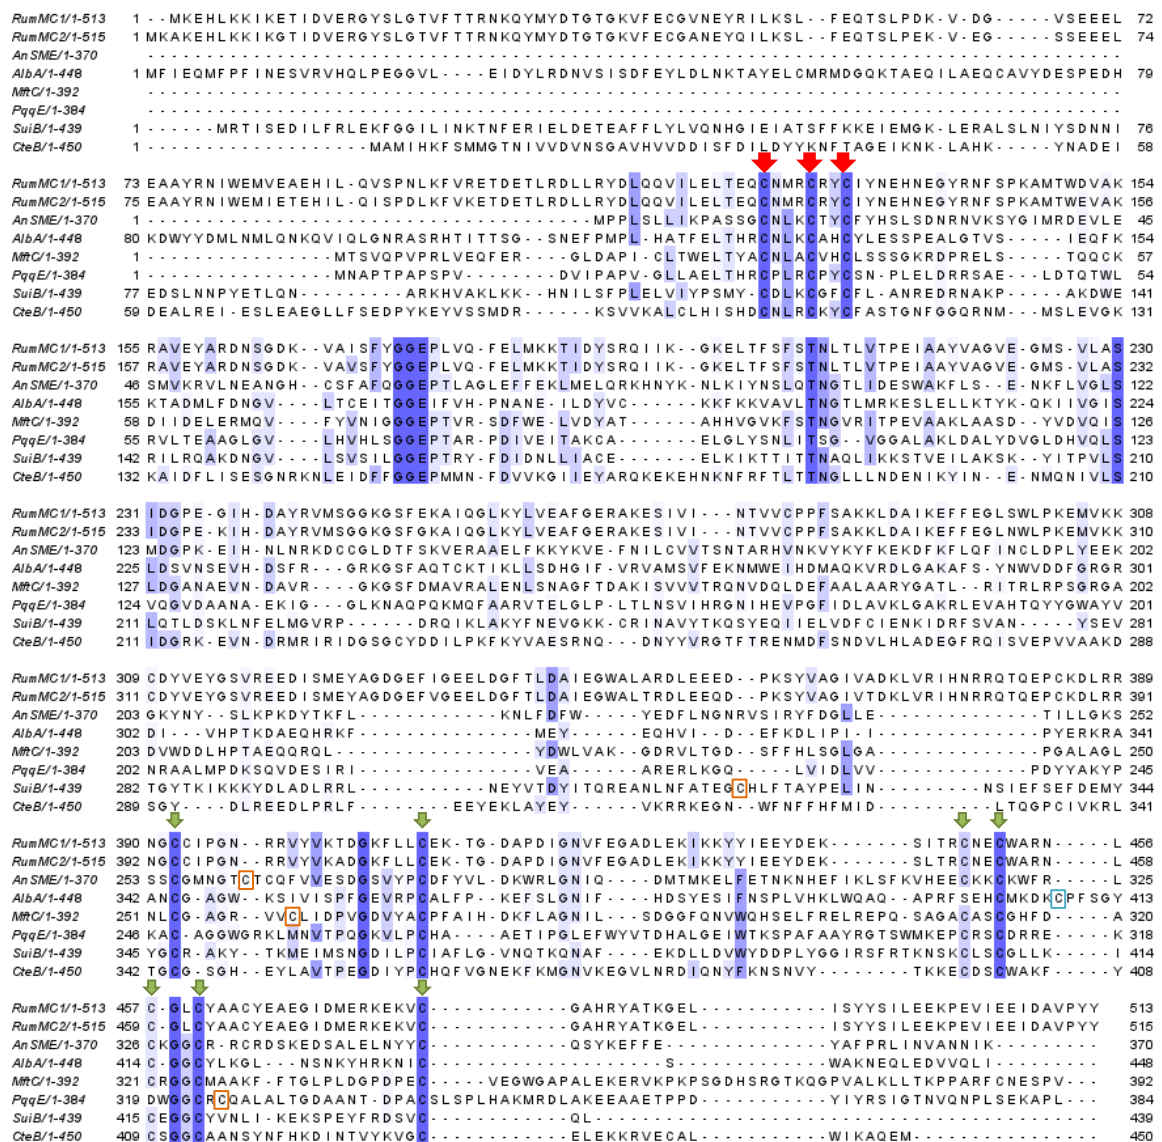

**Figure S1 - Sequence alignment of RumMC1 & RumMC2 with other SPASM-domain radical SAM enzymes.**

Sequences were aligned using Jalview (1). Blue highlighting is proportional to the conservation of amino acids between protein sequences. The canonical CX<sub>3</sub>CX<sub>2</sub>C motif is indicated by red arrows and the seven cysteine residues implicated in the SPASM motif are indicated by green arrows. For AlbA, a cysteine residue tentatively proposed to be involved in the coordination of the AuxII [4Fe-4S] cluster is squared in blue. The eighth cysteine residue, involved in the complete coordination of the AuxI [4Fe-4S] cluster in AnSME, MftC, PqqE and SuiB and CteB, is highlighted in orange.

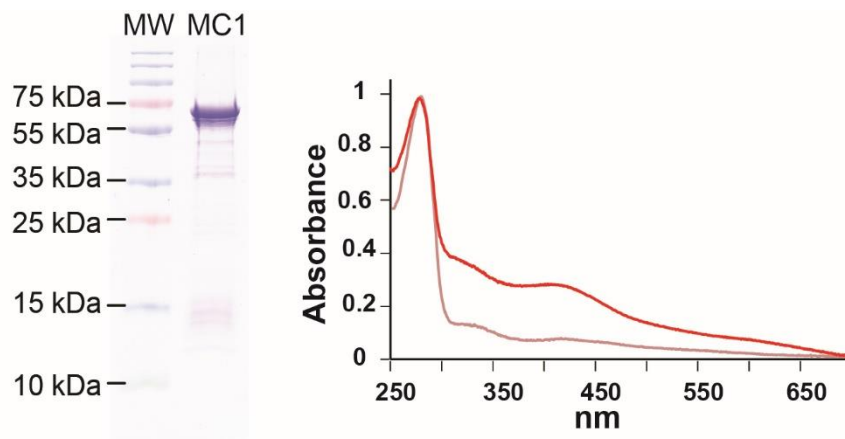

**Figure S2 – SDS-PAGE analysis and UV-visible spectrum of RumMC1 before (pink trace) and after (red trace) iron-sulfur cluster reconstitution.**

**A**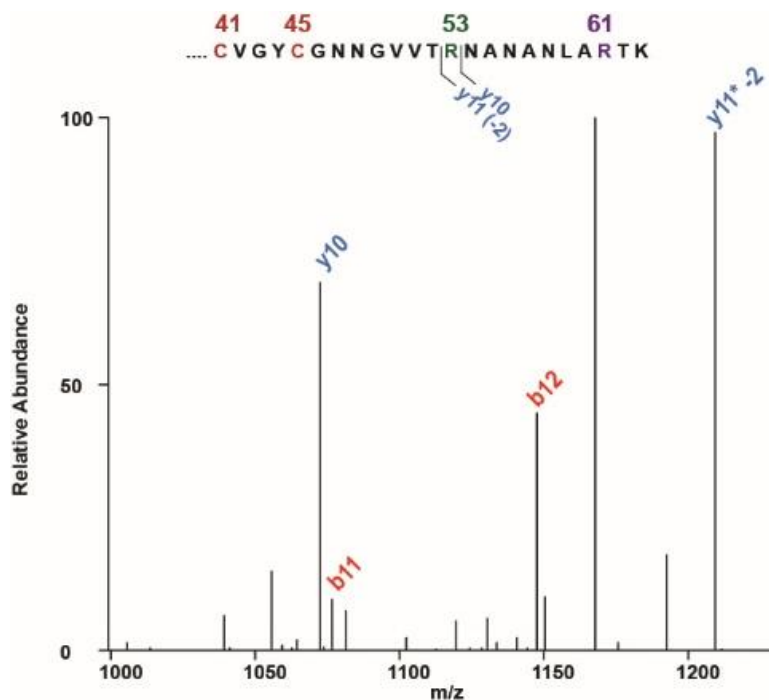**B**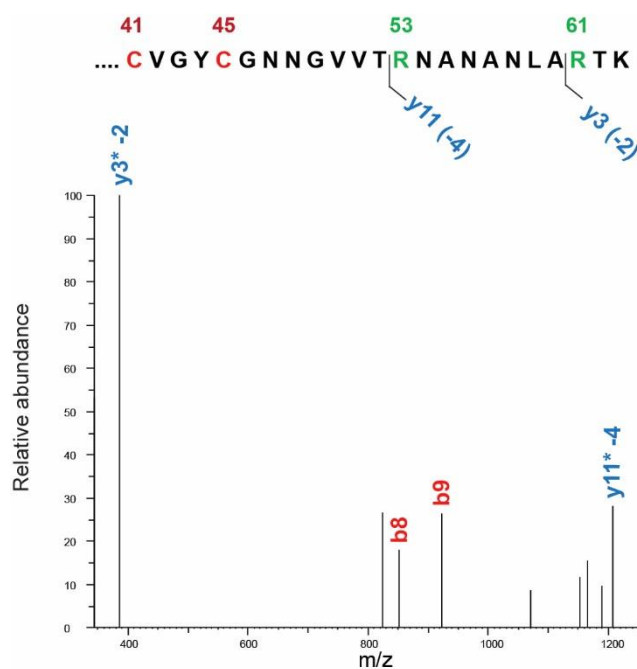

**Figure S3 – LC-MS analysis of the reaction performed with the C28-63 peptide**

(A) MS/MS analysis of P1s. Relevant peptide fragments are indicated showing that P1s contains a Cys<sup>45</sup>-to- Arg<sup>53</sup> thioether bond. (B) MS/MS analysis of P1d. Relevant peptide fragments are indicated showing that P1d contains a Cys<sup>41</sup>-to- Arg<sup>61</sup> thioether bond in addition to the Cys<sup>45</sup>-to- Arg<sup>53</sup> thioether bond (see table S2 for complete assignment). \* indicates loss of ammonia (-17.02 Da).

**C1** MRKIVAGKLQTFADFEKSKWGCVCSTAVANSHNAGPAYCVGYCGNNGVVTARNANANVAKTA  
**C2** MRKIVAGKLQTFADFEKSKGGCKCSGGAVVENSHNAGPAYCVGYCGNNGVVTARNANANLARTK  
**C3** MKLVETKTTKTGTNFEGNRAGCICNGTVAVANSHNAGPAYCVGYCGNSGVVTARNANANVAKTA  
**C4** MRLVQSKRIATGFNFEGSKAGCVCSGTAVANSHNAGPAYCVGYCGNNGEVTARNANYNIARRS  
**C5** MKLVTSKTMKTGTNFEGNKAGCICSGSVAVANSHNAGPAYCVGYCGNNGAVTARNANANLARTK

**Figure S4 - Sequence of the C1 to C5 peptides encoded by the RumC operon**  
 Arginine and lysine residues are highlighted in red and green respectively. Conserved cysteine residues are highlighted in blue.

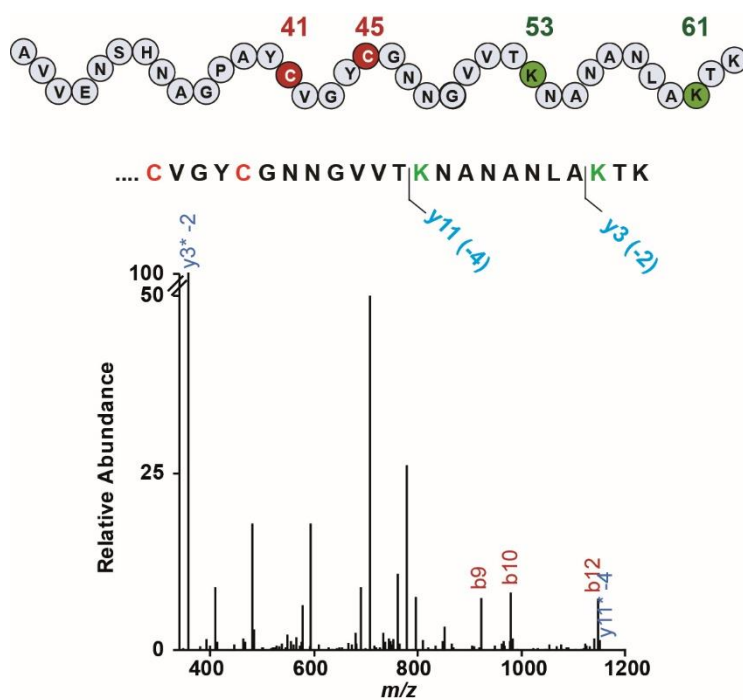

**Figure S5 - MS/MS spectrum of the P2d peptide obtained after incubation with RumMC2**

Relevant peptide fragments are indicated confirming that this peptide contains two thioether bridges (*i.e.* Lys<sup>53</sup>-Cys<sup>45</sup> and Lys<sup>61</sup>-Cys<sup>41</sup> bridges) (*see table S3* for complete assignment). \* indicates loss of ammonia (-17.02 Da).

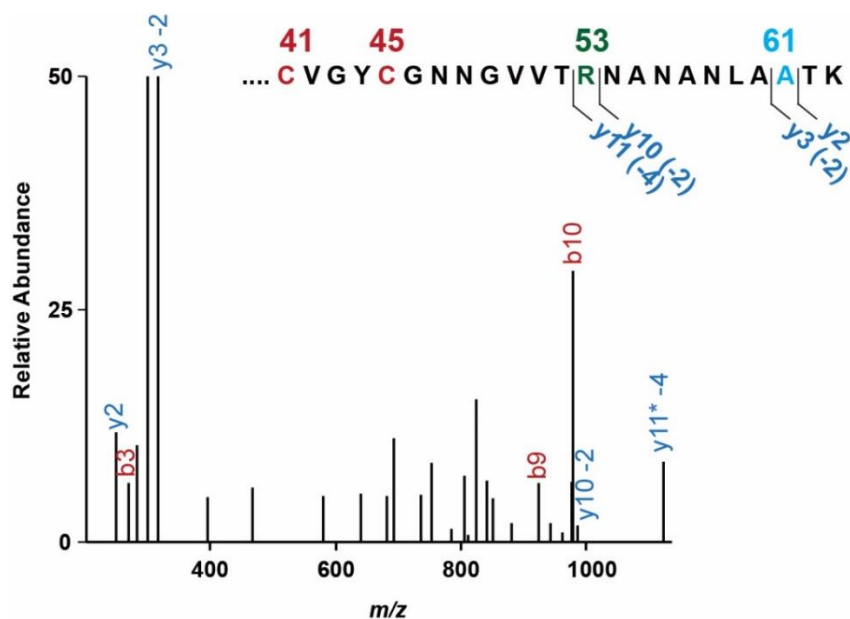

**Figure S6 - MS/MS spectrum of the P3d peptide obtained after incubation with RumMC2**

Relevant peptide fragments are indicated showing that this peptide contains two thioether bridges (*i.e.* Arg<sup>53</sup>-Cys<sup>45</sup> and Ala<sup>61</sup>-Cys<sup>41</sup> bridges) (*see table S4* for complete assignment). \* indicates loss of ammonia (-17.02 Da).

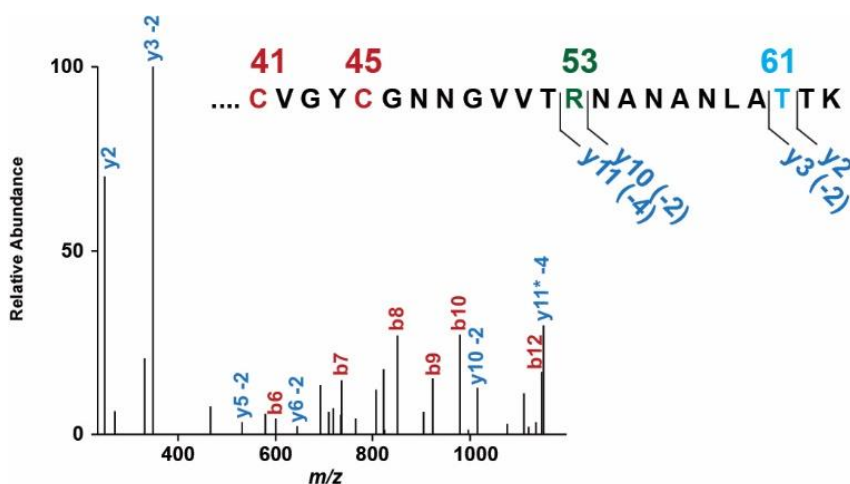

**Figure S7 – MS/MS spectrum of the P4d peptide obtained after incubation with RumMC2**

Relevant peptide fragments are indicated showing that this peptide contains two thioether bridges (*i.e.* Arg<sup>53</sup>-Cys<sup>45</sup> and Thr<sup>61</sup>-Cys<sup>41</sup> bridges) (*see table S5* for complete assignment). \* indicates loss of ammonia (-17.02 Da).

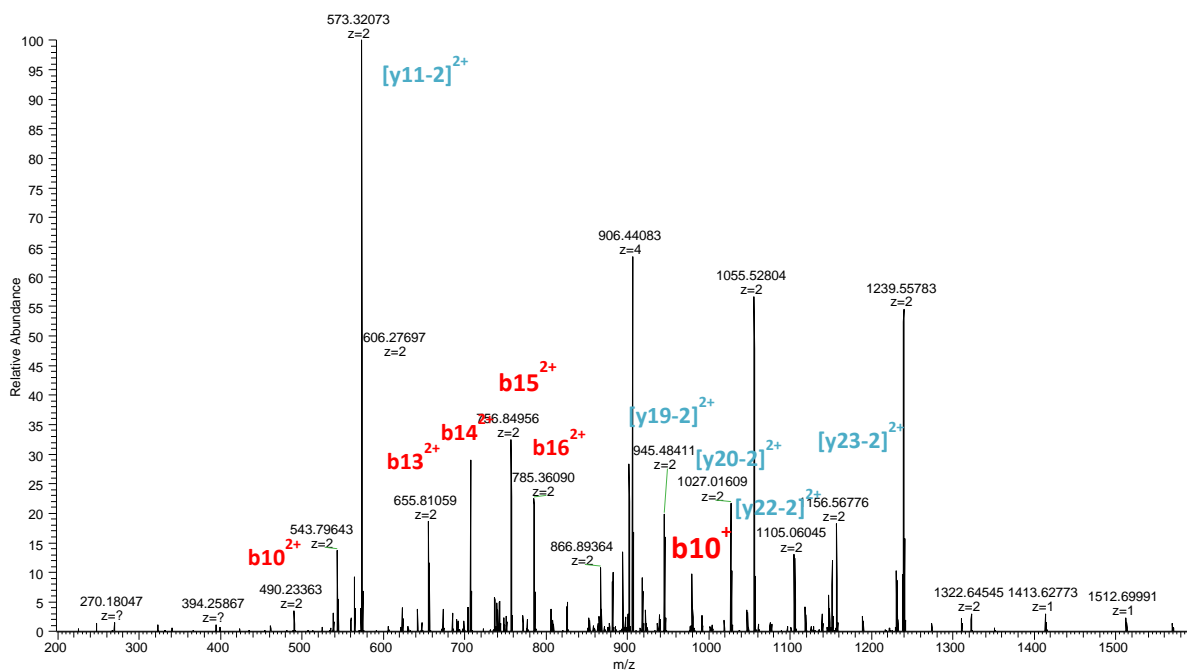

**Figure S8 – MS/MS spectrum of the P6s peptide**

See table S7 for complete assignment

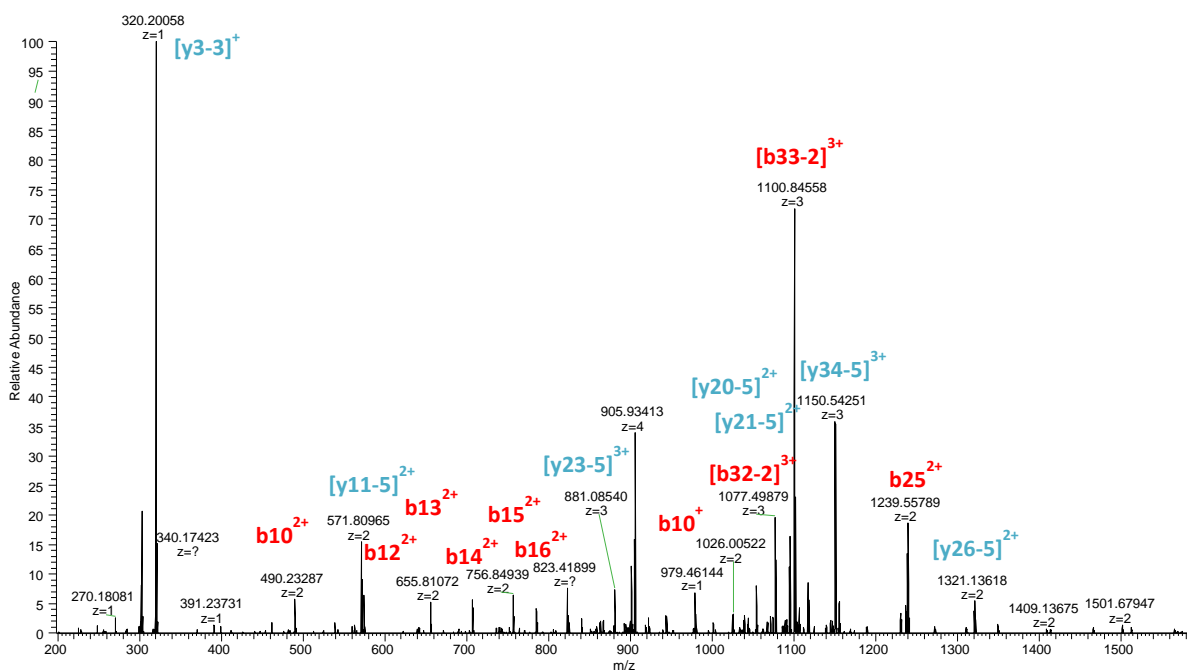

**Figure S9 – MS/MS spectrum of the P6d peptide**

See table S7 for complete assignment



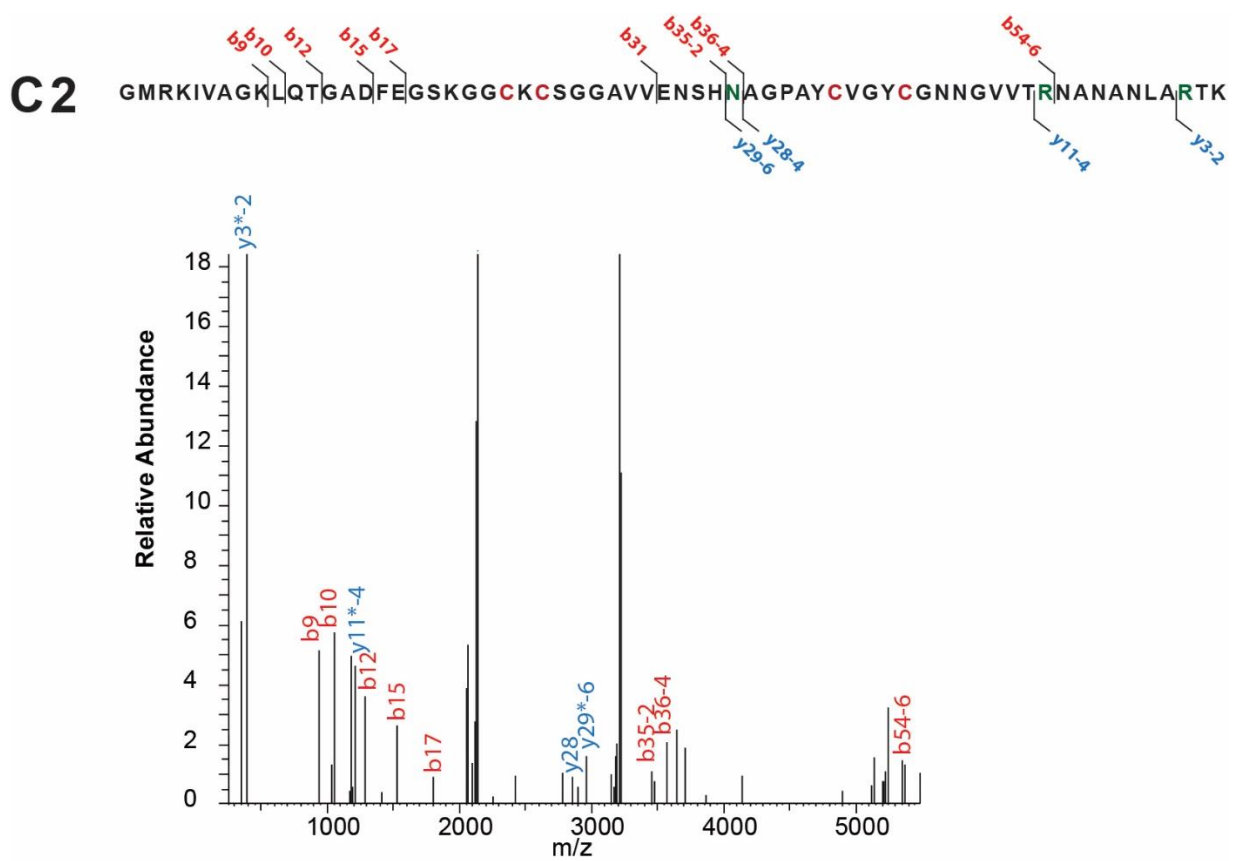

**Figure S10 – MS/MS analysis of the C2 peptide after incubation in the presence of RumMC2 $\Delta$ RRE and RRE-MC2.**

C2 (250  $\mu$ M) was incubated for 4 hours with RumMC2 $\Delta$ RRE (250  $\mu$ M), RRE-MC2 (250  $\mu$ M), SAM (2 mM) and sodium dithionite (3 mM). \* indicates loss of ammonia (-17.02 Da).

**Table S1 – Peptides used in this study and their theoretical and observed (obs) masses**

| Peptide                                                  | Formula              | [M+4H] <sup>4+</sup> | [M+4H] <sup>4+</sup> <sub>obs</sub> |
|----------------------------------------------------------|----------------------|----------------------|-------------------------------------|
| <b>C2<sub>28-63</sub></b>                                | C154 H246 N52 O51 S2 | 926.9497             | 926.9533                            |
| <b>C2<sub>28-63</sub>-2H</b>                             | C154 H244 N52 O51 S2 | 926.4457             | 926.4463                            |
| <b>C2<sub>28-63</sub>-4H</b>                             | C154 H242 N52 O51 S2 | 925.9419             | 925.9443                            |
| <b>C2<sub>28-63</sub>K<sup>53</sup>K<sup>61</sup></b>    | C154 H246 N48 O51 S2 | 912.9466             | 912.9545                            |
| <b>C2<sub>28-63</sub>K<sup>53</sup>K<sup>61</sup>-2H</b> | C154 H244 N48 O51 S2 | 912.4427             | 912.4449                            |
| <b>C2<sub>28-63</sub>K<sup>53</sup>K<sup>61</sup>-4H</b> | C154 H242 N48 O51 S2 | 911.9388             | 91.9415                             |
| <b>C2<sub>28-63</sub>A61</b>                             | C151 H239 N49 O51 S2 | 905.6837             | 905.6848                            |
| <b>C2<sub>28-63</sub>A61-2H</b>                          | C151 H237 N49 O51 S2 | 905.1797             | 905.1831                            |
| <b>C2<sub>28-63</sub>A61-4H</b>                          | C151 H235 N49 O51 S2 | 904.6759             | 904.6893                            |
| <b>C2<sub>28-63</sub>T<sup>61</sup></b>                  | C152 H241 N49 O52 S2 | 913.1863             | 913.1920                            |
| <b>C2<sub>28-63</sub>T<sup>61</sup>-2H</b>               | C152 H239 N49 O52 S2 | 912.6824             | 912.6920                            |
| <b>C2<sub>28-63</sub>T<sup>61</sup>-4H</b>               | C152 H237 N49 O52 S2 | 912.1785             | 912.1822                            |
| <b>C2<sub>28-63</sub>G61</b>                             | C150 H237 N49 O51 S2 | 902.1798             | 902.1845                            |
| <b>C2<sub>28-63</sub>G61-2H</b>                          | C150 H237 N49 O51 S2 | 901.6758             | 901.6862                            |
| <b>C2<sub>28-63</sub>G61-4H</b>                          | C150 H237 N49 O51 S2 | 901.1719             | 901.1770                            |

| Peptide                        | Formula                 | [M+4H] <sup>4+</sup> | [M+4H] <sup>4+</sup> <sub>obs</sub> |
|--------------------------------|-------------------------|----------------------|-------------------------------------|
| <b>C2<sub>28-63</sub>d3</b>    | C151 H236 N49 O51 S2 D3 | 906.4384             | 906.4409                            |
| <b>C2<sub>28-63</sub>d3-2H</b> | C151 H234 N49 O51 S2 D3 | 905.9344             | 905.9334                            |
| <b>C2<sub>28-63</sub>d3-4H</b> | C151 H232 N49 O51 S2 D3 | 905.4306             | 905.4329                            |

| Peptide                        | Formula                 | [M+4H] <sup>4+</sup> | [M+4H] <sup>4+</sup> <sub>obs</sub> |
|--------------------------------|-------------------------|----------------------|-------------------------------------|
| <b>C2<sub>28-63</sub>d4</b>    | C151 H235 N49 O51 S2 D4 | 906.6900             | 906.6928                            |
| <b>C2<sub>28-63</sub>d4-2H</b> | C151 H233 N49 O51 S2 D4 | 906.1860             | 906.1890                            |
| <b>C2<sub>28-63</sub>d4-4H</b> | C151 H231 N49 O51 S2 D4 | 905.4306             | 905.4344                            |

**Table S2 - Theoretical mass fragments of peptide C2<sub>28-63</sub> [M+H]<sup>+</sup>**

|   |    |    | <i>b</i>   | <i>y</i>   |    |
|---|----|----|------------|------------|----|
| A | 28 | 1  | 72.04444   | 3704.77691 | 36 |
| V | 29 | 2  | 171.11285  | 3633.73979 | 35 |
| V | 30 | 3  | 270.18126  | 3534.67138 | 34 |
| E | 31 | 4  | 399.22386  | 3435.60297 | 33 |
| N | 32 | 5  | 513.26678  | 3306.56037 | 32 |
| S | 33 | 6  | 600.29881  | 3192.51745 | 31 |
| H | 34 | 7  | 737.35772  | 3105.48542 | 30 |
| N | 35 | 8  | 851.40065  | 2968.42651 | 29 |
| A | 36 | 9  | 922.43776  | 2854.38358 | 28 |
| G | 37 | 10 | 979.45923  | 2783.34647 | 27 |
| P | 38 | 11 | 1076.51199 | 2726.325   | 26 |
| A | 39 | 12 | 1147.5491  | 2629.27224 | 25 |
| Y | 40 | 13 | 1310.61243 | 2558.23513 | 24 |
| C | 41 | 14 | 1413.62162 | 2395.1718  | 23 |
| V | 42 | 15 | 1512.69003 | 2292.16261 | 22 |
| G | 43 | 16 | 1569.71149 | 2193.0942  | 21 |
| Y | 44 | 17 | 1732.77482 | 2136.07273 | 20 |
| C | 45 | 18 | 1835.78401 | 1973.00941 | 19 |
| G | 46 | 19 | 1892.80547 | 1870.00022 | 18 |
| N | 47 | 20 | 2006.8484  | 1812.97876 | 17 |
| N | 48 | 21 | 2120.89133 | 1698.93583 | 16 |
| G | 49 | 22 | 2177.91279 | 1584.8929  | 15 |
| V | 50 | 23 | 2276.9812  | 1527.87144 | 14 |
| V | 51 | 24 | 2376.04962 | 1428.80303 | 13 |
| T | 52 | 25 | 2477.0973  | 1329.73461 | 12 |
| R | 53 | 26 | 2633.19841 | 1228.68693 | 11 |
| N | 54 | 27 | 2747.24133 | 1072.58582 | 10 |
| A | 55 | 28 | 2818.27845 | 958.5429   | 9  |
| N | 56 | 29 | 2932.32137 | 887.50578  | 8  |
| A | 57 | 30 | 3003.35849 | 773.46286  | 7  |
| N | 58 | 31 | 3117.40141 | 702.42574  | 6  |
| L | 59 | 32 | 3230.48548 | 588.38281  | 5  |
| A | 60 | 33 | 3301.52259 | 475.29875  | 4  |
| R | 61 | 34 | 3457.6237  | 404.26164  | 3  |
| T | 62 | 35 | 3558.67138 | 248.16053  | 2  |
| K | 63 | 36 | 3686.76634 | 147.11285  | 1  |

**Table S3 - Theoretical mass fragments of peptide C2<sub>28-63</sub>K<sup>53</sup>K<sup>61</sup> [M+H]<sup>+</sup>**

|   |    |    | <i>b</i>   | <i>y</i>   |    |
|---|----|----|------------|------------|----|
| A | 28 | 1  | 72.04444   | 3648.76461 | 36 |
| V | 29 | 2  | 171.11285  | 3577.7275  | 35 |
| V | 30 | 3  | 270.18126  | 3478.65908 | 34 |
| E | 31 | 4  | 399.22386  | 3379.59067 | 33 |
| N | 32 | 5  | 513.26678  | 3250.54808 | 32 |
| S | 33 | 6  | 600.29881  | 3136.50515 | 31 |
| H | 34 | 7  | 737.35772  | 3049.47312 | 30 |
| N | 35 | 8  | 851.40065  | 2912.41421 | 29 |
| A | 36 | 9  | 922.43776  | 2798.37128 | 28 |
| G | 37 | 10 | 979.45923  | 2727.33417 | 27 |
| P | 38 | 11 | 1076.51199 | 2670.31271 | 26 |
| A | 39 | 12 | 1147.5491  | 2573.25994 | 25 |
| Y | 40 | 13 | 1310.61243 | 2502.22283 | 24 |
| C | 41 | 14 | 1413.62162 | 2339.1595  | 23 |
| V | 42 | 15 | 1512.69003 | 2236.15032 | 22 |
| G | 43 | 16 | 1569.71149 | 2137.0819  | 21 |
| Y | 44 | 17 | 1732.77482 | 2080.06044 | 20 |
| C | 45 | 18 | 1835.78401 | 1916.99711 | 19 |
| G | 46 | 19 | 1892.80547 | 1813.98793 | 18 |
| N | 47 | 20 | 2006.8484  | 1756.96646 | 17 |
| N | 48 | 21 | 2120.89133 | 1642.92353 | 16 |
| G | 49 | 22 | 2177.91279 | 1528.88061 | 15 |
| V | 50 | 23 | 2276.9812  | 1471.85914 | 14 |
| V | 51 | 24 | 2376.04962 | 1372.79073 | 13 |
| T | 52 | 25 | 2477.0973  | 1273.72232 | 12 |
| K | 53 | 26 | 2605.19226 | 1172.67464 | 11 |
| N | 54 | 27 | 2719.23518 | 1044.57968 | 10 |
| A | 55 | 28 | 2790.2723  | 930.53675  | 9  |
| N | 56 | 29 | 2904.31523 | 859.49963  | 8  |
| A | 57 | 30 | 2975.35234 | 745.45671  | 7  |
| N | 58 | 31 | 3089.39527 | 674.41959  | 6  |
| L | 59 | 32 | 3202.47933 | 560.37667  | 5  |
| A | 60 | 33 | 3273.51644 | 447.2926   | 4  |
| K | 61 | 34 | 3401.61141 | 376.25549  | 3  |
| T | 62 | 35 | 3502.65908 | 248.16053  | 2  |
| K | 63 | 36 | 3630.75405 | 147.11285  | 1  |

**Table S4 - Theoretical mass fragments of peptide C2<sub>28-63</sub>A<sup>61</sup> [M+H]<sup>+</sup>**

|   |    |    | <i>b</i>   | <i>y</i>   |    |
|---|----|----|------------|------------|----|
| A | 28 | 1  | 72.04444   | 3619.71291 | 36 |
| V | 29 | 2  | 171.11285  | 3548.6758  | 35 |
| V | 30 | 3  | 270.18126  | 3449.60738 | 34 |
| E | 31 | 4  | 399.22386  | 3350.53897 | 33 |
| N | 32 | 5  | 513.26678  | 3221.49638 | 32 |
| S | 33 | 6  | 600.29881  | 3107.45345 | 31 |
| H | 34 | 7  | 737.35772  | 3020.42142 | 30 |
| N | 35 | 8  | 851.40065  | 2883.36251 | 29 |
| A | 36 | 9  | 922.43776  | 2769.31958 | 28 |
| G | 37 | 10 | 979.45923  | 2698.28247 | 27 |
| P | 38 | 11 | 1076.51199 | 2641.26101 | 26 |
| A | 39 | 12 | 1147.5491  | 2544.20824 | 25 |
| Y | 40 | 13 | 1310.61243 | 2473.17113 | 24 |
| C | 41 | 14 | 1413.62162 | 2310.1078  | 23 |
| V | 42 | 15 | 1512.69003 | 2207.09861 | 22 |
| G | 43 | 16 | 1569.71149 | 2108.0302  | 21 |
| Y | 44 | 17 | 1732.77482 | 2051.00874 | 20 |
| C | 45 | 18 | 1835.78401 | 1887.94541 | 19 |
| G | 46 | 19 | 1892.80547 | 1784.93622 | 18 |
| N | 47 | 20 | 2006.8484  | 1727.91476 | 17 |
| N | 48 | 21 | 2120.89133 | 1613.87183 | 16 |
| G | 49 | 22 | 2177.91279 | 1499.82891 | 15 |
| V | 50 | 23 | 2276.9812  | 1442.80744 | 14 |
| V | 51 | 24 | 2376.04962 | 1343.73903 | 13 |
| T | 52 | 25 | 2477.0973  | 1244.67062 | 12 |
| R | 53 | 26 | 2633.19841 | 1143.62294 | 11 |
| N | 54 | 27 | 2747.24133 | 987.52183  | 10 |
| A | 55 | 28 | 2818.27845 | 873.4789   | 9  |
| N | 56 | 29 | 2932.32137 | 802.44179  | 8  |
| A | 57 | 30 | 3003.35849 | 688.39886  | 7  |
| N | 58 | 31 | 3117.40141 | 617.36174  | 6  |
| L | 59 | 32 | 3230.48548 | 503.31882  | 5  |
| A | 60 | 33 | 3301.52259 | 390.23475  | 4  |
| A | 61 | 34 | 3372.55971 | 319.19764  | 3  |
| T | 62 | 35 | 3473.60738 | 248.16053  | 2  |
| K | 63 | 36 | 3601.70235 | 147.11285  | 1  |

**Table S5 - Theoretical mass fragments of peptide C2<sub>28-63</sub>T<sup>61</sup> [M+H]<sup>+</sup>**

|   |    |    | <i>b</i>   | <i>y</i>   |    |
|---|----|----|------------|------------|----|
| A | 28 | 1  | 72.04444   | 3649.72348 | 36 |
| V | 29 | 2  | 171.11285  | 3578.68636 | 35 |
| V | 30 | 3  | 270.18126  | 3479.61795 | 34 |
| E | 31 | 4  | 399.22386  | 3380.54953 | 33 |
| N | 32 | 5  | 513.26678  | 3251.50694 | 32 |
| S | 33 | 6  | 600.29881  | 3137.46401 | 31 |
| H | 34 | 7  | 737.35772  | 3050.43199 | 30 |
| N | 35 | 8  | 851.40065  | 2913.37307 | 29 |
| A | 36 | 9  | 922.43776  | 2799.33015 | 28 |
| G | 37 | 10 | 979.45923  | 2728.29303 | 27 |
| P | 38 | 11 | 1076.51199 | 2671.27157 | 26 |
| A | 39 | 12 | 1147.5491  | 2574.21881 | 25 |
| Y | 40 | 13 | 1310.61243 | 2503.18169 | 24 |
| C | 41 | 14 | 1413.62162 | 2340.11836 | 23 |
| V | 42 | 15 | 1512.69003 | 2237.10918 | 22 |
| G | 43 | 16 | 1569.71149 | 2138.04077 | 21 |
| Y | 44 | 17 | 1732.77482 | 2081.0193  | 20 |
| C | 45 | 18 | 1835.78401 | 1917.95597 | 19 |
| G | 46 | 19 | 1892.80547 | 1814.94679 | 18 |
| N | 47 | 20 | 2006.8484  | 1757.92533 | 17 |
| N | 48 | 21 | 2120.89133 | 1643.8824  | 16 |
| G | 49 | 22 | 2177.91279 | 1529.83947 | 15 |
| V | 50 | 23 | 2276.9812  | 1472.81801 | 14 |
| V | 51 | 24 | 2376.04962 | 1373.74959 | 13 |
| T | 52 | 25 | 2477.0973  | 1274.68118 | 12 |
| R | 53 | 26 | 2633.19841 | 1173.6335  | 11 |
| N | 54 | 27 | 2747.24133 | 1017.53239 | 10 |
| A | 55 | 28 | 2818.27845 | 903.48946  | 9  |
| N | 56 | 29 | 2932.32137 | 832.45235  | 8  |
| A | 57 | 30 | 3003.35849 | 718.40942  | 7  |
| N | 58 | 31 | 3117.40141 | 647.37231  | 6  |
| L | 59 | 32 | 3230.48548 | 533.32938  | 5  |
| A | 60 | 33 | 3301.52259 | 420.24532  | 4  |
| T | 61 | 34 | 3402.57027 | 349.20821  | 3  |
| T | 62 | 35 | 3503.61795 | 248.16053  | 2  |
| K | 63 | 36 | 3631.71291 | 147.11285  | 1  |

**Table S6 - Theoretical mass fragments of peptide C228-63G<sup>61</sup> [M+H]<sup>+</sup>**

|   |    |    | <i>b</i>   | <i>y</i>   |    |
|---|----|----|------------|------------|----|
| A | 28 | 1  | 72.04444   | 3605.69726 | 36 |
| V | 29 | 2  | 171.11285  | 3534.66015 | 35 |
| V | 30 | 3  | 270.18126  | 3435.59173 | 34 |
| E | 31 | 4  | 399.22386  | 3336.52332 | 33 |
| N | 32 | 5  | 513.26678  | 3207.48073 | 32 |
| S | 33 | 6  | 600.29881  | 3093.4378  | 31 |
| H | 34 | 7  | 737.35772  | 3006.40577 | 30 |
| N | 35 | 8  | 851.40065  | 2869.34686 | 29 |
| A | 36 | 9  | 922.43776  | 2755.30393 | 28 |
| G | 37 | 10 | 979.45923  | 2684.26682 | 27 |
| P | 38 | 11 | 1076.51199 | 2627.24536 | 26 |
| A | 39 | 12 | 1147.5491  | 2530.19259 | 25 |
| Y | 40 | 13 | 1310.61243 | 2459.15548 | 24 |
| C | 41 | 14 | 1413.62162 | 2296.09215 | 23 |
| V | 42 | 15 | 1512.69003 | 2193.08296 | 22 |
| G | 43 | 16 | 1569.71149 | 2094.01455 | 21 |
| Y | 44 | 17 | 1732.77482 | 2036.99309 | 20 |
| C | 45 | 18 | 1835.78401 | 1873.92976 | 19 |
| G | 46 | 19 | 1892.80547 | 1770.92057 | 18 |
| N | 47 | 20 | 2006.8484  | 1713.89911 | 17 |
| N | 48 | 21 | 2120.89133 | 1599.85618 | 16 |
| G | 49 | 22 | 2177.91279 | 1485.81326 | 15 |
| V | 50 | 23 | 2276.9812  | 1428.79179 | 14 |
| V | 51 | 24 | 2376.04962 | 1329.72338 | 13 |
| T | 52 | 25 | 2477.0973  | 1230.65497 | 12 |
| R | 53 | 26 | 2633.19841 | 1129.60729 | 11 |
| N | 54 | 27 | 2747.24133 | 973.50618  | 10 |
| A | 55 | 28 | 2818.27845 | 859.46325  | 9  |
| N | 56 | 29 | 2932.32137 | 788.42614  | 8  |
| A | 57 | 30 | 3003.35849 | 674.38321  | 7  |
| N | 58 | 31 | 3117.40141 | 603.34609  | 6  |
| L | 59 | 32 | 3230.48548 | 489.30317  | 5  |
| A | 60 | 33 | 3301.52259 | 376.2191   | 4  |
| G | 61 | 34 | 3358.54406 | 305.18199  | 3  |
| T | 62 | 35 | 3459.59173 | 248.16053  | 2  |
| K | 63 | 36 | 3587.6867  | 147.11285  | 1  |

**Table S7 - Theoretical mass fragments of peptide C228-63A<sup>61</sup>d4**

|   |    | <i>b</i>   | <i>y</i>   |    |
|---|----|------------|------------|----|
| A | 1  | 72.04444   | 3623.73802 | 36 |
| V | 2  | 171.11285  | 3552.70091 | 35 |
| V | 3  | 270.18126  | 3453.63249 | 34 |
| E | 4  | 399.22386  | 3354.56408 | 33 |
| N | 5  | 513.26678  | 3225.52149 | 32 |
| S | 6  | 600.29881  | 3111.47856 | 31 |
| H | 7  | 737.35772  | 3024.44653 | 30 |
| N | 8  | 851.40065  | 2887.38762 | 29 |
| A | 9  | 922.43776  | 2773.34469 | 28 |
| G | 10 | 979.45923  | 2702.30758 | 27 |
| P | 11 | 1076.51199 | 2645.28612 | 26 |
| A | 12 | 1147.5491  | 2548.23335 | 25 |
| Y | 13 | 1310.61243 | 2477.19624 | 24 |
| C | 14 | 1413.62162 | 2314.13291 | 23 |
| V | 15 | 1512.69003 | 2211.12372 | 22 |
| G | 16 | 1569.71149 | 2112.05531 | 21 |
| Y | 17 | 1732.77482 | 2055.03385 | 20 |
| C | 18 | 1835.78401 | 1891.97052 | 19 |
| G | 19 | 1892.80547 | 1788.96133 | 18 |
| N | 20 | 2006.8484  | 1731.93987 | 17 |
| N | 21 | 2120.89133 | 1617.89694 | 16 |
| G | 22 | 2177.91279 | 1503.85402 | 15 |
| V | 23 | 2276.9812  | 1446.83255 | 14 |
| V | 24 | 2376.04962 | 1347.76414 | 13 |
| T | 25 | 2477.0973  | 1248.69573 | 12 |
| R | 26 | 2633.19841 | 1147.64805 | 11 |
| N | 27 | 2747.24133 | 991.54694  | 10 |
| A | 28 | 2818.27845 | 877.50401  | 9  |
| N | 29 | 2932.32137 | 806.4669   | 8  |
| A | 30 | 3003.35849 | 692.42397  | 7  |
| N | 31 | 3117.40141 | 621.38685  | 6  |
| L | 32 | 3230.48548 | 507.34393  | 5  |
| A | 33 | 3301.52259 | 394.25986  | 4  |
| A | 34 | 3376.58482 | 323.22275  | 3  |
| T | 35 | 3477.63249 | 248.16053  | 2  |
| K | 36 | 3605.72746 | 147.11285  | 1  |



**Table S8 - Theoretical Mass fragments of peptide C228-63A<sup>61</sup>d3**

|          |           | <i>b</i>   | <i>y</i>   |    |
|----------|-----------|------------|------------|----|
| <b>A</b> | <b>1</b>  | 72.04444   | 3622.73174 | 36 |
| <b>V</b> | <b>2</b>  | 171.11285  | 3551.69463 | 35 |
| <b>V</b> | <b>3</b>  | 270.18126  | 3452.62621 | 34 |
| <b>E</b> | <b>4</b>  | 399.22386  | 3353.5578  | 33 |
| <b>N</b> | <b>5</b>  | 513.26678  | 3224.51521 | 32 |
| <b>S</b> | <b>6</b>  | 600.29881  | 3110.47228 | 31 |
| <b>H</b> | <b>7</b>  | 737.35772  | 3023.44025 | 30 |
| <b>N</b> | <b>8</b>  | 851.40065  | 2886.38134 | 29 |
| <b>A</b> | <b>9</b>  | 922.43776  | 2772.33841 | 28 |
| <b>G</b> | <b>10</b> | 979.45923  | 2701.3013  | 27 |
| <b>P</b> | <b>11</b> | 1076.51199 | 2644.27984 | 26 |
| <b>A</b> | <b>12</b> | 1147.5491  | 2547.22707 | 25 |
| <b>Y</b> | <b>13</b> | 1310.61243 | 2476.18996 | 24 |
| <b>C</b> | <b>14</b> | 1413.62162 | 2313.12663 | 23 |
| <b>V</b> | <b>15</b> | 1512.69003 | 2210.11744 | 22 |
| <b>G</b> | <b>16</b> | 1569.71149 | 2111.04903 | 21 |
| <b>Y</b> | <b>17</b> | 1732.77482 | 2054.02757 | 20 |
| <b>C</b> | <b>18</b> | 1835.78401 | 1890.96424 | 19 |
| <b>G</b> | <b>19</b> | 1892.80547 | 1787.95505 | 18 |
| <b>N</b> | <b>20</b> | 2006.8484  | 1730.93359 | 17 |
| <b>N</b> | <b>21</b> | 2120.89133 | 1616.89066 | 16 |
| <b>G</b> | <b>22</b> | 2177.91279 | 1502.84774 | 15 |
| <b>V</b> | <b>23</b> | 2276.9812  | 1445.82627 | 14 |
| <b>V</b> | <b>24</b> | 2376.04962 | 1346.75786 | 13 |
| <b>T</b> | <b>25</b> | 2477.0973  | 1247.68945 | 12 |
| <b>R</b> | <b>26</b> | 2633.19841 | 1146.64177 | 11 |
| <b>N</b> | <b>27</b> | 2747.24133 | 990.54066  | 10 |
| <b>A</b> | <b>28</b> | 2818.27845 | 876.49773  | 9  |
| <b>N</b> | <b>29</b> | 2932.32137 | 805.46062  | 8  |
| <b>A</b> | <b>30</b> | 3003.35849 | 691.41769  | 7  |
| <b>N</b> | <b>31</b> | 3117.40141 | 620.38057  | 6  |
| <b>L</b> | <b>32</b> | 3230.48548 | 506.33765  | 5  |
| <b>A</b> | <b>33</b> | 3301.52259 | 393.25358  | 4  |
| <b>A</b> | <b>34</b> | 3375.57854 | 322.21647  | 3  |
| <b>T</b> | <b>35</b> | 3476.62621 | 248.16053  | 2  |
| <b>K</b> | <b>36</b> | 3604.72118 | 147.11285  | 1  |

## Supplementary references

1. Waterhouse, A. M., Procter, J. B., Martin, D. M., Clamp, M., and Barton, G. J. (2009) Jalview Version 2--a multiple sequence alignment editor and analysis workbench. *Bioinformatics*. **25**, 1189-1191
